# Supplementary material
Source: PubMed Central journal article supplement (PMC2771663)
Supplement: NIHMS151749-supplement-Supplement1.pdf [file NIHMS151749-supplement-Supplement1.pdf]

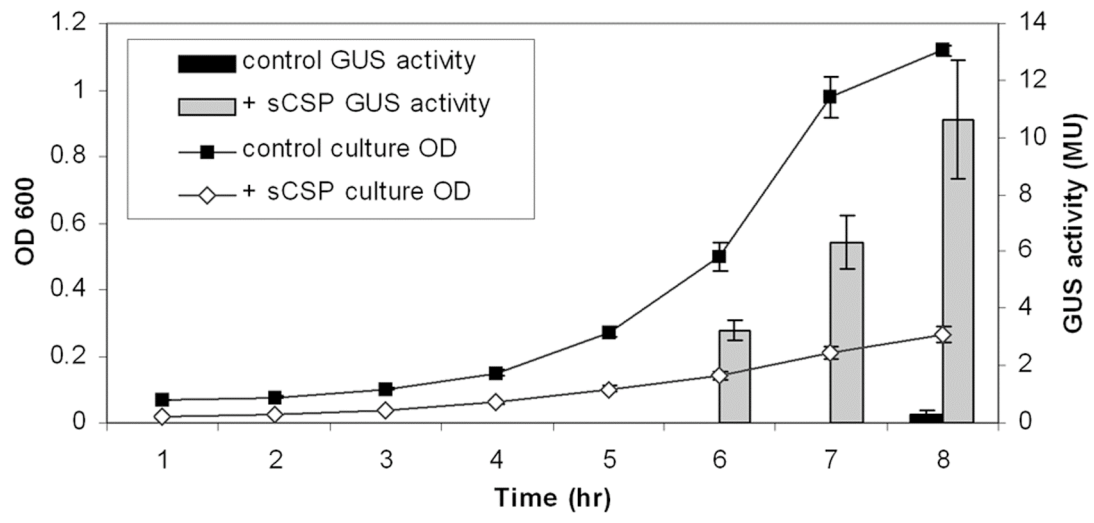

SI Fig. S1

A.

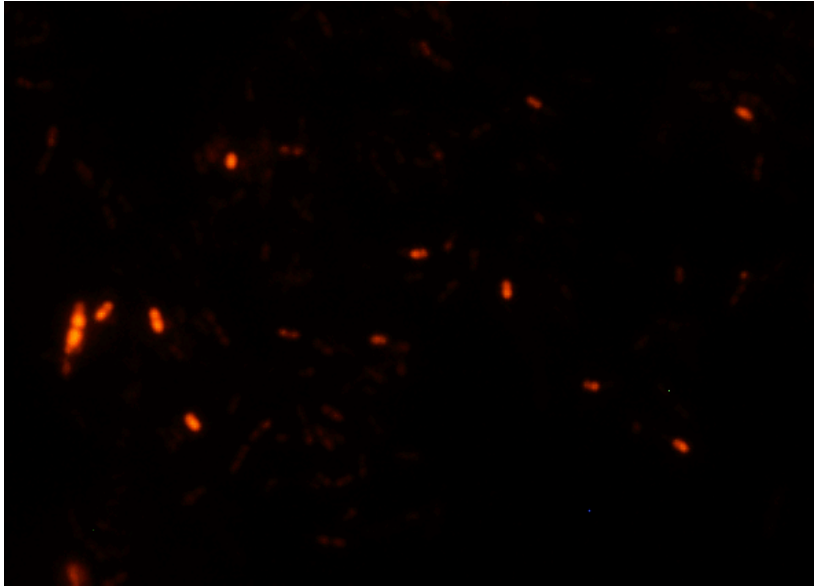

B.

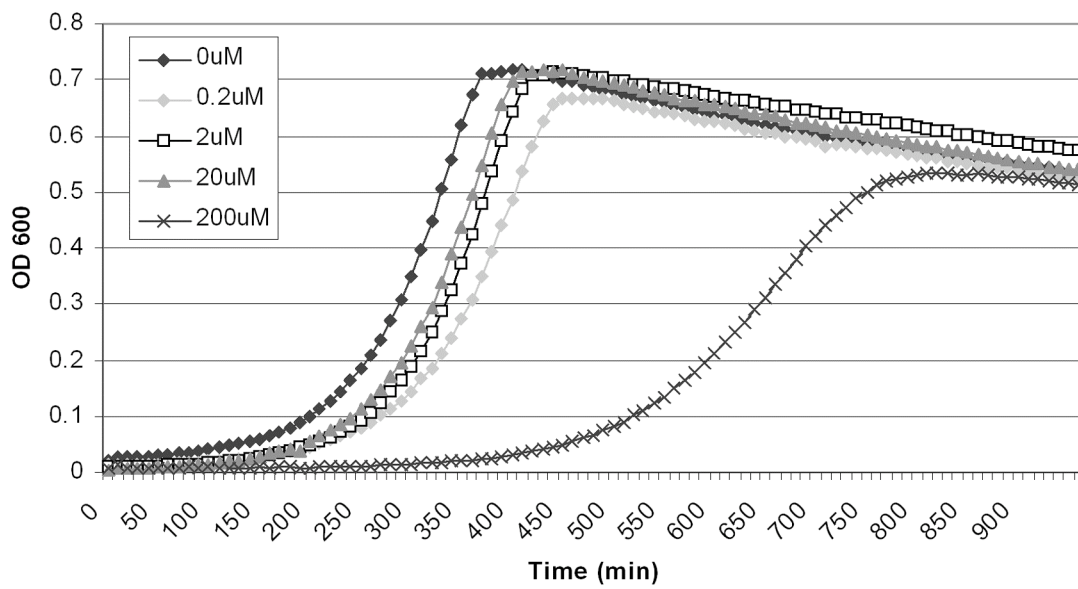

SI Fig. S2

A.

*S. thermophilus*

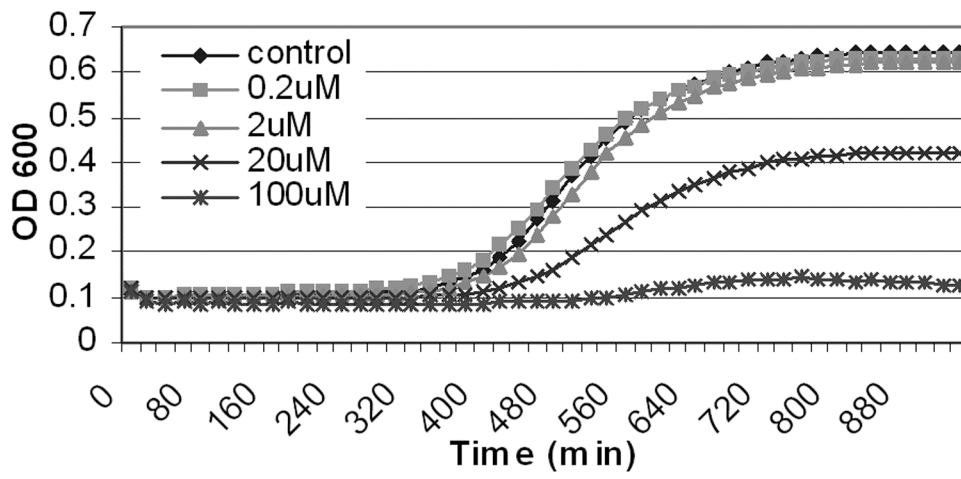

B.

*S. salivarius*

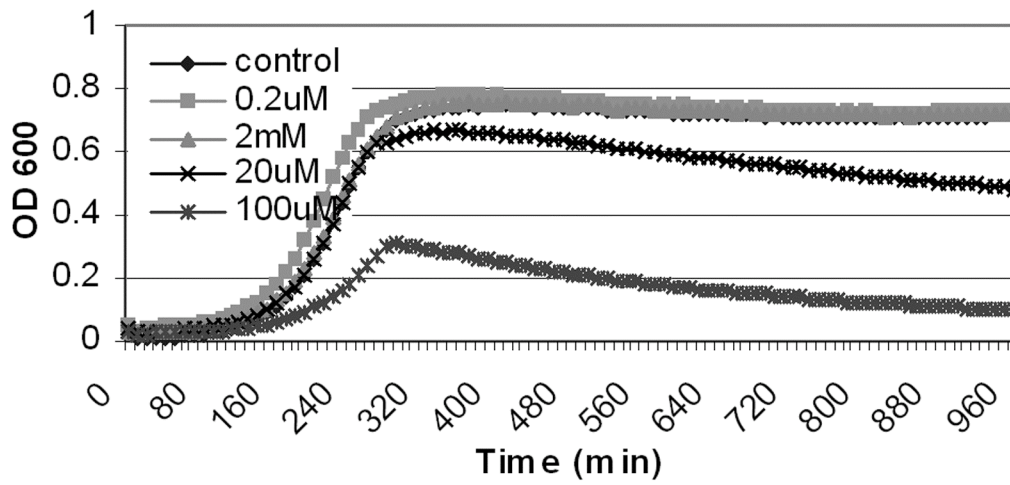

SI Fig. S3

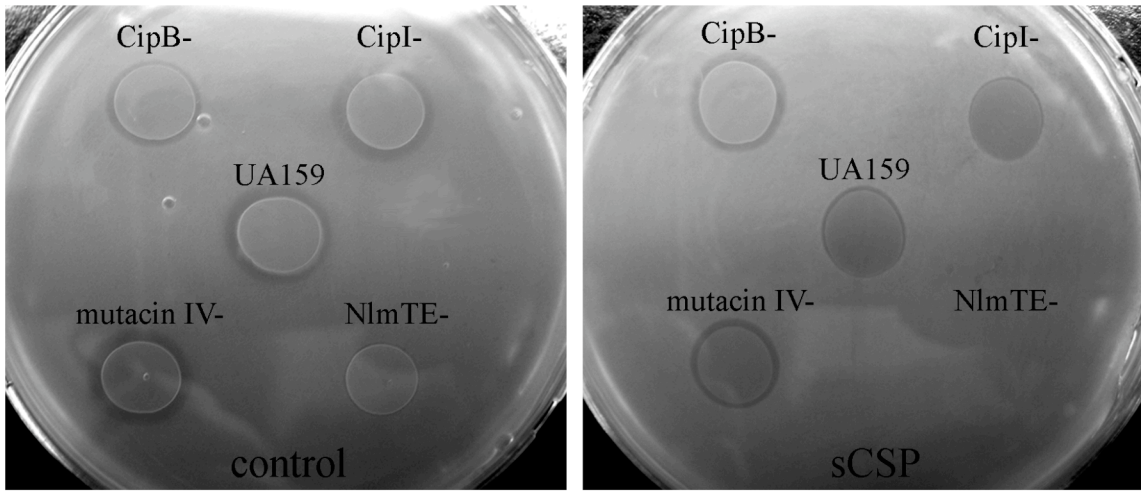

SI Fig. S4

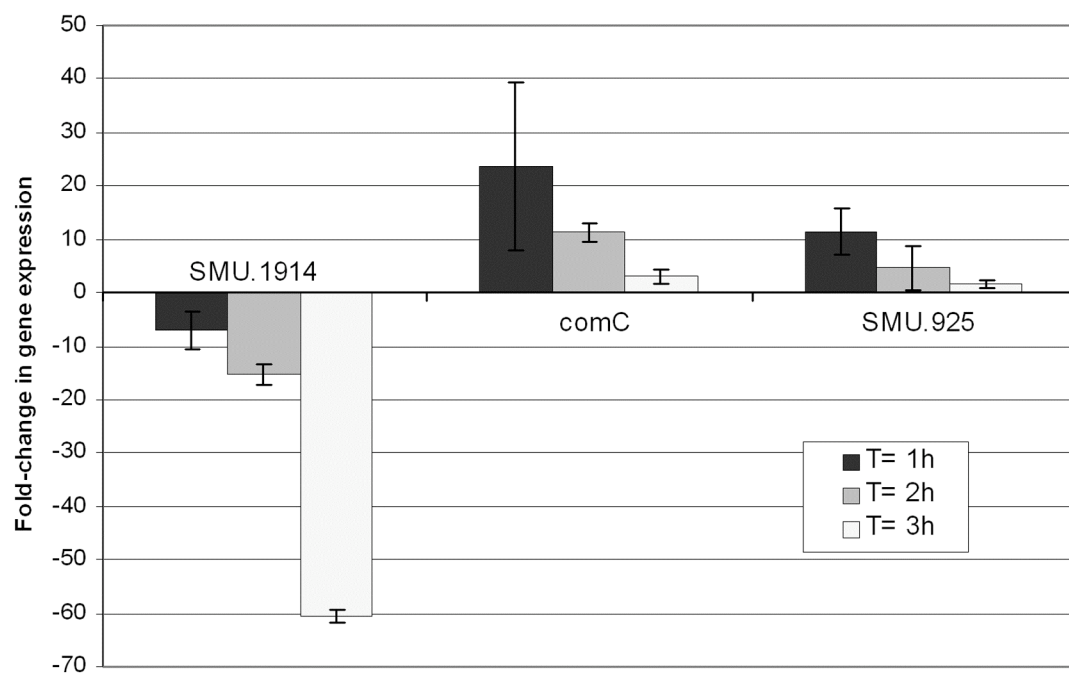

SI Fig. S5

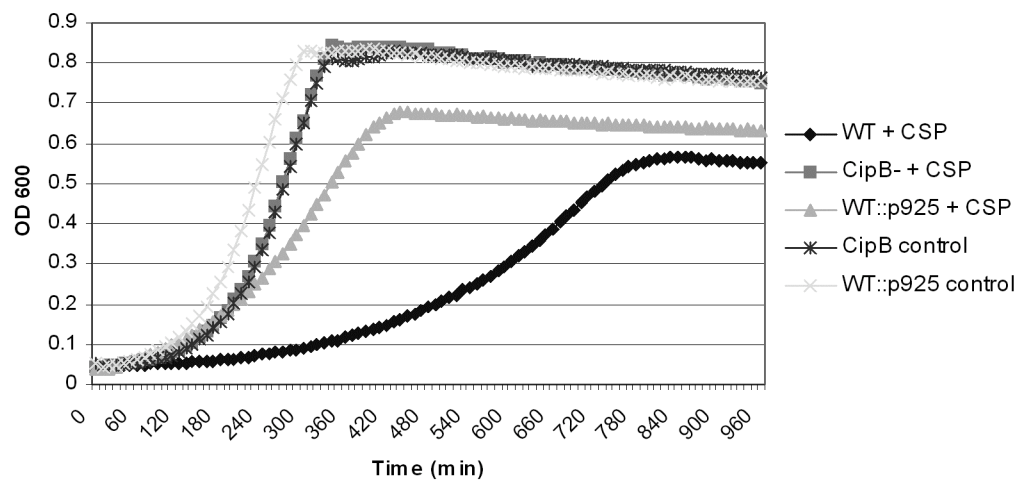

SI Fig. S6

## Supporting Information: Figure Legends

**SI Fig. S1.** Effect of sCSP on culture density and cell lysis. The culture-wide graded response to increasing concentrations of sCSP could be due to an identical bacteriostatic response in the whole population, or to an ‘all-or-none’ induction of cell lysis in a fraction of the population. To distinguish between the two, the release of the cytoplasmic enzyme  $\beta$ -glucuronidase (GUS) into the supernatant of growing cultures was quantified as a measure of cell lysis. The observed increase in GUS activity in presence of sCSP favors the induction of lysis in a fraction of the population. ‘Control’ cultures were grown in THYE without sCSP, while ‘+ sCSP’ cultures were supplemented with 2  $\mu$ M sCSP. The OD<sub>600</sub> of the culture is plotted at time points corresponding to times at which GUS activity in the supernatant was assayed. GUS activity is normalized to the optical density of the culture at each time point, and is expressed in Miller units (MU).

**SI Fig. S2.** A sub-set of the population undergoes cells lysis, while the majority remains sCSP-unresponsive. Viability staining using propidium iodide indicates less than 10% of the population is dead in the presence of 2  $\mu$ M sCSP (A). Growth of cells when re-suspended in fresh THYE after overnight exposure to sCSP at the concentrations indicated. Growth resumes after sCSP exposure even at 200  $\mu$ M, suggesting that a sub-population of cells is always resistant to sCSP-mediated cell lysis (B).

**SI Fig. S3.** Growth of *Streptococcus thermophilus* (A) and *Streptococcus salivarius* (B) in increasing concentrations of their species-specific signaling peptides. In these two non-competence species of streptococci, the peptide signaling system is composed of CSP-ComDE

paralogues BIP (bacteriocin-inducing peptide) and BlpRH, known to induce expression of bacteriocins. The similarity between these BIP-induced growth curves and the CSP-induced growth curves in *S. mutans* strongly suggests the involvement of a bacteriocin in the *S. mutans* cell death cascade.

**SI Fig. S4.** Agar overlay assays showing bacteriocin production in the UA159 wild-type and mutants defective in the CipB bacteriocin, the CipI immunity protein, the bacteriocin mutacin IV and the bacteriocin transporter NImTE. Bacteriocin expression is measured against the indicator strain *Lactococcus lactis* I6 by cells grown in the absence (control) and presence of sCSP.

**SI Fig. S5.** Quantitative real-time RT-PCR gene expression profiles of SMU.1914 (encoding CipB), *comC* (encoding CSP) and SMU.925 (encoding CipI) at 1-h, 2-h, and 3-h intervals following 1:100 dilution from an overnight culture. Gene expression was normalized to the expression of the constitutively expressed 16S rRNA gene.

**SI Fig S6.** Growth of the wild-type and a wild-type strain over-expressing SMU.925 from a multi-copy plasmid in the absence and presence of 2  $\mu$ M sCSP. The sCSP-resistant CipB mutant was used as a control.



**SI Table S1.** Genes showing a minimum  $\pm$  2-fold difference in expression when *S. mutans* UA159 cells were exposed to 2  $\mu$ M sCSP

| <b>Gene ID</b>                                                    | <b>Putative or assigned function</b>                                                    | <b>Fold</b> |
|-------------------------------------------------------------------|-----------------------------------------------------------------------------------------|-------------|
| <b>Amino acid biosynthesis</b>                                    |                                                                                         |             |
| SMU.1073                                                          | putative formyl-tetrahydrofolate synthetase                                             | -3.3        |
| SMU.1265                                                          | putative phosphoribosyl formimino-5-aminoimidazole carboxamide ribonucleotide isomerase | -2.0        |
| SMU.1266                                                          | putative glutamine amidotransferase HisH                                                | -2.1        |
| SMU.1268                                                          | putative imidazoleglycerol-phosphate dehydratase                                        | -2.2        |
| SMU.1269                                                          | putative phosphoserine phosphatase                                                      | -1.9        |
| SMU.1270                                                          | putative histidinol dehydrogenase                                                       | -2.3        |
| SMU.1271                                                          | putative ATP phosphoribosyltransferase                                                  | -2.1        |
| SMU.1273                                                          | putative histidinol-phosphate aminotransferase                                          | -2.4        |
| SMU.1877                                                          | putative PTS system, mannose-specific component IIB                                     | -2.9        |
| SMU.531                                                           | putative chorismate mutase                                                              | 4.3         |
| SMU.532                                                           | putative anthranilate synthase, alpha subunit                                           | 3.4         |
| SMU.534                                                           | putative phosphoribosyl anthranilate transferase                                        | 3.4         |
| SMU.535                                                           | putative indoleglycerol phosphate synthase                                              | 3.7         |
| SMU.536                                                           | putative phosphoribosyl anthranilate isomerase                                          | 2.5         |
| SMU.537                                                           | putative tryptophan synthase, beta subunit                                              | 2.5         |
| SMU.538                                                           | putative tryptophan synthase, alpha subunit                                             | 2.8         |
| <b>Biosynthesis of cofactors, prosthetic groups, and carriers</b> |                                                                                         |             |
| SMU.1996                                                          | putative isopentenyl monophosphate kinase                                               | 3.3         |
| SMU.353                                                           | conserved hypothetical protein                                                          | 5.3         |
| SMU.838                                                           | glutathione reductase                                                                   | 6.5         |
| SMU.954                                                           | putative pyridoxal kinase                                                               | 2.3         |
| <b>Cell envelope</b>                                              |                                                                                         |             |
| SMU.109                                                           | conserved hypothetical protein; possible permease (efflux protein)                      | 5.7         |
| SMU.1196c                                                         | conserved hypothetical protein                                                          | 2.3         |
| SMU.1677                                                          | putative UDP-N-acetylmuramoylananine-D-glutamate-2,6- diaminopimelate ligase; UDP-I     | 2.4         |
| SMU.196c                                                          | putative transfer protein                                                               | 3.0         |
| SMU.2075c                                                         | conserved hypothetical protein                                                          | 2.9         |
| SMU.2081                                                          | hypothetical protein                                                                    | 7.5         |
| SMU.539c                                                          | signal peptidase type IV                                                                | 22.4        |
| SMU.610                                                           | cell surface antigen SpaP                                                               | -2.5        |
| SMU.627                                                           | conserved hypothetical protein                                                          | 4.5         |
| SMU.63c                                                           | conserved hypothetical protein                                                          | 5.3         |
| SMU.67                                                            | putative acyltransferase                                                                | 4.0         |
| SMU.883                                                           | dextran glucosidase DexB                                                                | -5.6        |
| <b>Cellular processes</b>                                         |                                                                                         |             |
| SMU.1001                                                          | putative DNA processing Smf protein                                                     | 19.0        |
| SMU.1279c                                                         | putative cell division protein (cell shape determining protein)                         | 2.0         |
| SMU.1343c                                                         | putative polyketide synthase                                                            | -3.4        |
| SMU.1346                                                          | putative thioesterase BacT                                                              | -2.5        |
| SMU.150                                                           | hypothetical protein                                                                    | 11.2        |
| SMU.1862                                                          | hypothetical protein                                                                    | 2.4         |
| SMU.1897                                                          | putative ABC transporter, ATP-binding protein                                           | 9.2         |
| SMU.1898                                                          | putative ABC transporter, ATP-binding and permease protein                              | 4.2         |
| SMU.1900                                                          | conserved hypothetical protein                                                          | 5.9         |
| SMU.1905c                                                         | putative bacteriocin secretion protein                                                  | 10.1        |
| SMU.1906c                                                         | hypothetical protein                                                                    | 11.4        |

|                                        |                                                                              |      |
|----------------------------------------|------------------------------------------------------------------------------|------|
| SMU.1914c                              | hypothetical protein                                                         | 20.4 |
| SMU.1916                               | putative histidine kinase of the competence regulon, ComD                    | 10.5 |
| SMU.1917                               | putative response regulator of the competence regulon, ComE                  | 11.3 |
| SMU.1983                               | putative competence protein ComYD                                            | 26.6 |
| SMU.1984                               | putative competence protein ComYC                                            | 26.2 |
| SMU.1985                               | putative ABC transporter ComYB; probably part of the DNA transport machinery | 23.9 |
| SMU.1987                               | putative ABC transporter, ATP-binding protein ComYA; late competence gene    | 17.5 |
| SMU.1997                               | 16S ribosomal RNA                                                            | 14.3 |
| SMU.2084c                              | conserved hypothetical protein                                               | 5.6  |
| SMU.400                                | putative secreted esterase                                                   | 2.8  |
| SMU.423                                | hypothetical protein                                                         | 14.6 |
| SMU.426                                | copper-transporting ATPase; P-type ATPase                                    | 7.3  |
| SMU.499                                | putative late competence protein                                             | 18.0 |
| SMU.54                                 | putative amino acid recemase                                                 | -3.5 |
| SMU.625                                | putative competence protein                                                  | 14.1 |
| SMU.626                                | putative competence protein                                                  | 25.6 |
| SMU.629                                | putative manganese-type superoxide dismutase, Fe/Mn-SOD                      | -2.2 |
| SMU.632                                | putative transcriptional regulator                                           | 2.4  |
| SMU.644                                | putative competence protein/transcription factor                             | 27.2 |
| SMU.655                                | putative MutE                                                                | 3.9  |
| SMU.753                                | conserved hypothetical protein                                               | 4.0  |
| <b>Central intermediary metabolism</b> |                                                                              |      |
| SMU.636                                | putative N-acetylglucosamine-6-phosphate isomerase                           | 3.1  |
| <b>DNA metabolism</b>                  |                                                                              |      |
| SMU.1002                               | putative DNA topoisomerase I                                                 | 8.2  |
| SMU.1034c                              | putative integrase/recombinase; XerC-like                                    | 2.2  |
| SMU.1055                               | putative DNA repair protein RadC                                             | 14.1 |
| SMU.1967                               | putative single-stranded DNA-binding protein                                 | 16.4 |
| SMU.2085                               | recombination protein RecA                                                   | 6.7  |
| SMU.2086                               | putative competence and damage inducible protein CinA                        | 10.2 |
| SMU.327                                | putative DNA repair protein                                                  | 3.2  |
| SMU.505                                | putative adenine-specific DNA methylase                                      | 11.8 |
| SMU.506                                | putative type II restriction endonuclease                                    | 9.0  |
| SMU.64                                 | Holliday junction DNA helicase RuvB                                          | 8.0  |
| <b>Energy metabolism</b>               |                                                                              |      |
| SMU.1004                               | glucosyltransferase-I                                                        | 6.0  |
| SMU.127                                | putative acetoin dehydrogenase (TPP-dependent), E1 component alpha subunit   | -2.2 |
| SMU.128                                | putative acetoin dehydrogenase (TPP-dependent), E1 component beta subunit    | -2.5 |
| SMU.129                                | putative dihydrolipoamide acetyltransferase                                  | -2.6 |
| SMU.130                                | putative dihydrolipoamide dehydrogenase                                      | -2.7 |
| SMU.1327c                              | conserved hypothetical protein; possible 4Fe-4S ferredoxin                   | 3.0  |
| SMU.1424                               | putative dihydrolipoamide dehydrogenase                                      | 2.9  |
| SMU.148                                | putative alcohol-acetaldehyde dehydrogenase                                  | 3.4  |
| SMU.1978                               | putative acetate kinase                                                      | 9.0  |
| SMU.2037                               | putative trehalose-6-phosphate hydrolase TreA                                | 6.7  |
| SMU.352                                | putative ribulose-phosphate-3-epimerase                                      | 6.0  |
| SMU.402                                | pyruvate formate-lyase                                                       | -2.2 |
| SMU.772                                | glucan-binding protein D with lipase activity; BglB-like protein             | 10.0 |
| SMU.79                                 | fructan hydrolase; exo-beta-D-fructosidase; FruB                             | -4.5 |

|                                               |                                                        |      |
|-----------------------------------------------|--------------------------------------------------------|------|
| SMU.877                                       | alpha-galactosidase                                    | -3.3 |
| SMU.881                                       | sucrose phosphorylase, GtfA                            | -5.8 |
| SMU.886                                       | galactokinase, GalK                                    | -2.6 |
| SMU.887                                       | galactose-1-P-uridyl transferase, GalT                 | -2.6 |
| SMU.888                                       | UDP-galactose 4-epimerase, GalE                        | -2.7 |
| <b>Fatty acid and phospholipid metabolism</b> |                                                        |      |
| SMU.1344c                                     | putative malonyl-CoA acyl-carrier-protein transacylase | -2.9 |
| SMU.1345c                                     | putative peptide synthetase similar to MycA            | -2.7 |
| <b>Hypothetical proteins</b>                  |                                                        |      |
| SMU.108                                       | hypothetical protein                                   | 4.9  |
| SMU.1197                                      | tRNA-Arg                                               | 2.6  |
| SMU.1267c                                     | hypothetical protein                                   | -2.1 |
| SMU.1438c                                     | putative Zn-dependent protease                         | 2.1  |
| SMU.151                                       | hypothetical protein                                   | 12.4 |
| SMU.1651                                      | putative arsenate reductase                            | 2.4  |
| SMU.167                                       | hypothetical protein                                   | 10.0 |
| SMU.1904c                                     | hypothetical protein                                   | 12.2 |
| SMU.1915                                      | competence stimulating peptide, precursor              | 3.8  |
| SMU.1956c                                     | hypothetical protein                                   | -5.0 |
| SMU.1979c                                     | conserved hypothetical protein                         | 22.0 |
| SMU.1980c                                     | conserved hypothetical protein                         | 24.6 |
| SMU.1982c                                     | conserved hypothetical protein                         | 22.3 |
| SMU.199c                                      | hypothetical protein                                   | 2.8  |
| SMU.202c                                      | hypothetical protein                                   | 2.8  |
| SMU.205c                                      | hypothetical protein                                   | 3.5  |
| SMU.2076c                                     | hypothetical protein                                   | 10.1 |
| SMU.2077c                                     | conserved hypothetical protein                         | 2.7  |
| SMU.2078c                                     | conserved hypothetical protein                         | 2.4  |
| SMU.2079c                                     | conserved hypothetical protein                         | 2.8  |
| SMU.2080                                      | conserved hypothetical protein                         | 3.3  |
| SMU.209c                                      | hypothetical protein                                   | 3.8  |
| SMU.212c                                      | hypothetical protein                                   | 3.8  |
| SMU.217c                                      | hypothetical protein                                   | 2.5  |
| SMU.326                                       | conserved hypothetical protein                         | 3.3  |
| SMU.470                                       | conserved hypothetical protein                         | 2.4  |
| SMU.503c                                      | hypothetical protein                                   | -2.2 |
| SMU.53                                        | conserved hypothetical protein                         | -3.5 |
| SMU.56                                        | conserved hypothetical protein                         | -3.1 |
| SMU.649                                       | conserved hypothetical protein                         | -2.0 |
| SMU.840c                                      | hypothetical protein                                   | 2.1  |
| SMU.959c                                      | hypothetical protein                                   | -2.2 |
| SMU.1047c                                     | hypothetical protein                                   | 6.2  |
| SMU.1056                                      | hypothetical protein                                   | 5.7  |
| SMU.1069c                                     | hypothetical protein                                   | 3.7  |
| SMU.1147c                                     | hypothetical protein                                   | 5.0  |
| SMU.1250c                                     | hypothetical protein                                   | 1.9  |
| SMU.152                                       | hypothetical protein                                   | 16.1 |
| SMU.153                                       | hypothetical protein                                   | 12.2 |
| SMU.166                                       | hypothetical protein                                   | 9.1  |
| SMU.1902c                                     | hypothetical protein                                   | 9.8  |

|                                                           |                                                                    |      |
|-----------------------------------------------------------|--------------------------------------------------------------------|------|
| SMU.1903c                                                 | hypothetical protein                                               | 16.0 |
| SMU.1907                                                  | hypothetical protein                                               | 8.9  |
| SMU.1908c                                                 | hypothetical protein                                               | 18.3 |
| SMU.1909c                                                 | hypothetical protein                                               | 19.6 |
| SMU.1910c                                                 | hypothetical protein                                               | 18.3 |
| SMU.1912c                                                 | hypothetical protein                                               | 22.2 |
| SMU.1913c                                                 | putative immunity protein, BLpL-like                               | 15.2 |
| SMU.1976c                                                 | hypothetical protein                                               | 3.6  |
| SMU.200c                                                  | hypothetical protein                                               | 2.8  |
| SMU.204c                                                  | hypothetical protein                                               | 3.0  |
| SMU.2083c                                                 | hypothetical protein                                               | 4.0  |
| SMU.210c                                                  | hypothetical protein                                               | 3.2  |
| SMU.215c                                                  | hypothetical protein                                               | 3.2  |
| SMU.216c                                                  | hypothetical protein                                               | 2.5  |
| SMU.378                                                   | hypothetical protein                                               | 2.5  |
| SMU.41                                                    | hypothetical protein                                               | 2.7  |
| SMU.49                                                    | hypothetical protein                                               | -2.9 |
| SMU.55                                                    | hypothetical protein                                               | -3.6 |
| SMU.58                                                    | hypothetical protein                                               | -3.1 |
| SMU.637c                                                  | hypothetical protein                                               | 2.9  |
| SMU.68                                                    | hypothetical protein                                               | 2.9  |
| SMU.735                                                   | hypothetical protein                                               | 2.1  |
| SMU.771c                                                  | hypothetical protein                                               | 8.0  |
| SMU.925                                                   | hypothetical protein                                               | 18.2 |
| <b>Mobile and extrachromosomal element functions</b>      |                                                                    |      |
| SMU.149                                                   | putative transposase                                               | 4.1  |
| SMU.195c                                                  | hypothetical protein; similar to ORF 5 of bacteriophage SPP1       | 3.3  |
| SMU.198c                                                  | putative conjugative transposon protein                            | 2.6  |
| SMU.2027                                                  | putative transcriptional regulator                                 | 4.7  |
| <b>Protein fate</b>                                       |                                                                    |      |
| SMU.131                                                   | putative lipocate-protein ligase                                   | -2.4 |
| SMU.645                                                   | putative oligopeptidase                                            | 10.4 |
| <b>Protein synthesis</b>                                  |                                                                    |      |
| SMU.1044c                                                 | putative pseudouridylate synthase                                  | 2.5  |
| SMU.1512                                                  | putative phenylalanyl-tRNA synthetase (alpha subunit)              | -2.3 |
| SMU.154                                                   | 30S ribosomal protein S15                                          | 2.2  |
| SMU.1886                                                  | putative seryl-tRNA synthetase                                     | -2.1 |
| SMU.2000                                                  | 50S ribosomal protein L17                                          | -2.3 |
| SMU.2002                                                  | 30S ribosomal protein S11                                          | -2.1 |
| SMU.2012                                                  | 30S ribosomal protein S8                                           | -2.1 |
| SMU.2014                                                  | 30S ribosomal protein S14                                          | -2.0 |
| SMU.2015                                                  | 50S ribosomal protein L5                                           | -2.5 |
| SMU.2016                                                  | 50S ribosomal protein L24                                          | -2.1 |
| SMU.2017                                                  | 50S ribosomal protein L14                                          | -2.1 |
| SMU.2022                                                  | 50S ribosomal protein L22                                          | -2.3 |
| SMU.500                                                   | putative ribosome-associated protein                               | 2.7  |
| SMU.558                                                   | isoleucine-tRNA synthetase                                         | -2.1 |
| <b>Purines, pyrimidines, nucleosides, and nucleotides</b> |                                                                    |      |
| SMU.30                                                    | putative phosphoribosylformylglycinamide synthase, (FGAM synthase) | -2.6 |
| SMU.325                                                   | putative dUTPase                                                   | 4.1  |
| SMU.356                                                   | purine operon repressor                                            | 3.8  |

|                                       |                                                                                        |      |
|---------------------------------------|----------------------------------------------------------------------------------------|------|
| SMU.48                                | putative phosphoribosylamine-glycine ligase; phosphoribosyl glycinamide synthetase (G/ | -2.4 |
| SMU.50                                | putative phosphoribosylaminoimidazole carboxylase, catalytic subunit                   | -2.6 |
| SMU.51                                | putative phosphoribosylaminoimidazole carboxylase, ATPase subunit                      | -3.4 |
| SMU.668c                              | ribonucleotide reductase, large subunit                                                | -2.0 |
| <b>Regulatory functions</b>           |                                                                                        |      |
| SMU.1048                              | conserved hypothetical protein                                                         | 2.4  |
| SMU.1145c                             | putative histidine kinase; homolog of RumK and ScnK (HK3)                              | 2.4  |
| SMU.1193                              | putative transcriptional regulator                                                     | 2.5  |
| SMU.1409c                             | putative transcriptional regulator                                                     | 2.4  |
| SMU.1509                              | putative transcriptional regulator                                                     | 2.2  |
| SMU.168                               | putative transcriptional regulator                                                     | 8.7  |
| SMU.1964c                             | putative response regulator (RR9)                                                      | 4.8  |
| SMU.1977c                             | putative transcriptional regulator                                                     | 3.8  |
| SMU.207c                              | putative transposon protein                                                            | 4.4  |
| SMU.424                               | negative transcriptional regulator, CopY                                               | 8.4  |
| SMU.507                               | putative transcriptional regulator (DeoR family)                                       | 6.0  |
| SMU.61                                | putative transcriptional regulator                                                     | 3.1  |
| SMU.65                                | putative protein tyrosine-phosphatase                                                  | 6.6  |
| SMU.80                                | transcriptional regulator; repressor (HrcA) of class I heat shock genes                | 3.0  |
| SMU.927                               | putative response regulator (RR4)                                                      | 4.8  |
| SMU.928                               | putative histidine kinase (HK4)                                                        | 5.3  |
| <b>Signal transduction</b>            |                                                                                        |      |
| SMU.1957                              | putative PTS system, mannose-specific IID component                                    | -5.1 |
| SMU.1958c                             | putative PTS system, mannose-specific IIC component                                    | -4.4 |
| SMU.1960c                             | putative PTS system, mannose-specific IIB component                                    | -3.4 |
| SMU.1961c                             | putative PTS system, sugar-specific enzyme IIA component                               | -3.2 |
| SMU.1965c                             | putative histidine kinase (HK9)                                                        | 5.5  |
| <b>Transcription</b>                  |                                                                                        |      |
| SMU.2001                              | DNA-directed RNA polymerase, alpha subunit                                             | -2.2 |
| <b>Transport and binding proteins</b> |                                                                                        |      |
| SMU.1006                              | putative ABC transporter, ATP-binding protein                                          | 2.9  |
| SMU.1067c                             | putative ABC transporter, permease protein                                             | 2.7  |
| SMU.1068c                             | putative ABC transporter, ATP-binding protein                                          | 3.0  |
| SMU.1148                              | putative transporter, ATP-binding protein; bacteriocin immunity protein                | 2.4  |
| SMU.1185                              | PTS system, mannitol-specific enzyme IIBC component                                    | 2.4  |
| SMU.1194                              | putative ABC transporter, ATP-binding protein                                          | 2.2  |
| SMU.1195                              | conserved hypothetical protein; possible permease                                      | 2.0  |
| SMU.1848                              | hypothetical protein                                                                   | 2.1  |
| SMU.1878                              | putative PTS system, mannose-specific component IIC                                    | -3.0 |
| SMU.1879                              | putative PTS system, mannose-specific component IID                                    | -3.9 |
| SMU.1899                              | putative ABC transporter, ATP-binding and permease protein (fragment)                  | 5.2  |
| SMU.1963c                             | putative sugar-binding periplasmic protein                                             | 4.0  |
| SMU.1966c                             | putative periplasmic sugar-binding protein                                             | 7.1  |
| SMU.2038                              | putative PTS system, trehalose-specific IABC component                                 | 5.3  |
| SMU.242c                              | putative amino acid ABC transporter, permease protein, glutamine transport system      | -2.0 |
| SMU.427                               | putative copper chaperone                                                              | 6.5  |
| SMU.862                               | conserved hypothetical protein; putative permease                                      | 2.1  |
| SMU.863                               | putative ABC transporter, ATP-binding protein                                          | 1.9  |
| SMU.864                               | putative ABC transporter, permease component                                           | 2.0  |
| SMU.872                               | putative PTS system, fructose-specific enzyme IABC component                           | -2.1 |

|                         |                                                                              |      |
|-------------------------|------------------------------------------------------------------------------|------|
| SMU.878                 | multiple sugar-binding ABC transporter, sugar-binding protein precursor MsmE | -4.4 |
| SMU.879                 | multiple sugar-binding ABC transporter, permease protein MsmF                | -5.4 |
| SMU.880                 | multiple sugar-binding ABC transporter, permease protein MsmG                | -5.6 |
| SMU.882                 | multiple sugar-binding ABC transporter, ATP-binding protein, MsmK            | -5.9 |
| <b>Unclassified</b>     |                                                                              |      |
| SMU.1111c               | conserved hypothetical protein                                               | 2.0  |
| SMU.1342                | putative bacitracin synthetase 1; BacA                                       | -2.9 |
| SMU.1372c               | hypothetical protein                                                         | 2.2  |
| SMU.193c                | conserved hypothetical protein                                               | 2.9  |
| SMU.1981c               | conserved hypothetical protein                                               | 25.9 |
| SMU.1988c               | putative DNA binding protein                                                 | 2.0  |
| SMU.2057c               | putative cadmium-transporting ATPase; P-type ATPase                          | 4.0  |
| SMU.214c                | hypothetical protein                                                         | 2.2  |
| SMU.219                 | hypothetical protein                                                         | 2.0  |
| SMU.52                  | conserved hypothetical protein                                               | -3.6 |
| SMU.73                  | conserved hypothetical protein                                               | -2.7 |
| SMU.758c                | conserved hypothetical protein                                               | 3.3  |
| SMU.769                 | conserved hypothetical protein                                               | 9.5  |
| SMU.78                  | fructan hydrolase; exo-beta-D-fructosidase; fructanase, FruA                 | -5.5 |
| SMU.836                 | hypothetical protein                                                         | 18.3 |
| <b>Unknown function</b> |                                                                              |      |
| SMU.1003                | putative glucose-inhibited division protein                                  | 7.1  |
| SMU.1046c               | putative GTP pyrophosphokinase                                               | 2.4  |
| SMU.1053                | conserved hypothetical protein                                               | 6.4  |
| SMU.1054                | putative glutamine amidotransferase                                          | 6.0  |
| SMU.1070c               | conserved hypothetical protein                                               | 3.4  |
| SMU.1322                | putative acetoin dehydrogenase                                               | 2.0  |
| SMU.1323                | conserved hypothetical protein; possible hydrolase                           | 2.0  |
| SMU.1340                | putative surfactin synthetase                                                | -2.0 |
| SMU.1341c               | putative gramicidin S synthetase                                             | -2.4 |
| SMU.1400c               | conserved hypothetical protein                                               | 4.7  |
| SMU.1975c               | conserved hypothetical protein; possible membrane protein                    | 2.5  |
| SMU.208c                | putative transposon protein; possible DNA segregation ATPase                 | 3.3  |
| SMU.328                 | putative carbonic anhydrase                                                  | 2.2  |
| SMU.354                 | conserved hypothetical protein                                               | 6.2  |
| SMU.355                 | putative CMP-binding factor                                                  | 6.8  |
| SMU.399                 | conserved hypothetical protein                                               | 2.5  |
| SMU.401c                | conserved hypothetical protein                                               | 2.5  |
| SMU.498                 | putative late competence protein                                             | 22.4 |
| SMU.508                 | conserved hypothetical protein                                               | 7.2  |
| SMU.641                 | putative oxidoreductase                                                      | 2.1  |
| SMU.646                 | putative phosphatase                                                         | 9.5  |
| SMU.647                 | putative methyltransferase                                                   | 2.7  |
| SMU.66                  | conserved hypothetical protein                                               | 5.0  |
| SMU.72                  | conserved hypothetical protein                                               | -2.4 |
| SMU.807                 | putative membrane protein                                                    | 2.1  |
| SMU.837                 | putative reductase                                                           | 14.1 |
| SMU.890                 | conserved hypothetical protein                                               | 2.0  |
| SMU.926                 | conserved hypothetical protein; possible GTP-pyrophosphokinase               | 5.4  |

**SI Table S2.** *S. mutans* genes showing a minimum  $\pm$  2-fold difference in expression when *S. mutans*  $\Delta comX$  cells were exposed to 2  $\mu$ M sCSP

| <b>Gene ID</b> | <b>Putative or assigned function</b>                                         | <b>Fold</b> |
|----------------|------------------------------------------------------------------------------|-------------|
| SMU.925        | hypothetical protein                                                         | 2.7         |
| SMU.150        | hypothetical protein                                                         | 5.3         |
| SMU.151        | hypothetical protein                                                         | 4.9         |
| SMU.152        | hypothetical protein                                                         | 5.4         |
| SMU.153        | hypothetical protein                                                         | 5.2         |
| SMU.1902c      | hypothetical protein                                                         | 2.5         |
| SMU.1903c      | hypothetical protein                                                         | 5.0         |
| SMU.1904c      | hypothetical protein                                                         | 5.1         |
| SMU.1905c      | putative bacteriocin secretion protein                                       | 5.1         |
| SMU.1906c      | hypothetical protein                                                         | 4.8         |
| SMU.1908c      | hypothetical protein                                                         | 4.9         |
| SMU.1909c      | hypothetical protein                                                         | 5.7         |
| SMU.1910c      | hypothetical protein                                                         | 5.6         |
| SMU.1912c      | hypothetical protein                                                         | 4.9         |
| SMU.1913c      | putative immunity protein, BLpL-like                                         | 5.2         |
| SMU.1914c      | hypothetical protein                                                         | 4.5         |
| SMU.2037       | putative trehalose-6-phosphate hydrolase TreA                                | 2.1         |
| SMU.2038       | putative PTS system, trehalose-specific IIABC component                      | 2.3         |
| SMU.41         | hypothetical protein                                                         | -3.3        |
| SMU.423        | hypothetical protein                                                         | 5.8         |
| SMU.424        | negative transcriptional regulator, CopY                                     | 2.0         |
| SMU.426        | copper-transporting ATPase; P-type ATPase                                    | 2.5         |
| SMU.427        | putative copper chaperone                                                    | 2.1         |
| SMU.63c        | conserved hypothetical protein                                               | 2.7         |
| SMU.64         | Holliday junction DNA helicase RuvB                                          | 2.7         |
| SMU.65         | putative protein tyrosine-phosphatase                                        | 2.8         |
| SMU.66         | conserved hypothetical protein                                               | 2.1         |
| SMU.78         | fructan hydrolase; exo-beta-D-fructosidase; fructanase, FruA                 | -2.0        |
| SMU.799c       | conserved hypothetical protein                                               | 2.6         |
| SMU.877        | alpha-galactosidase                                                          | -2.2        |
| SMU.878        | multiple sugar-binding ABC transporter, sugar-binding protein precursor MsmE | -2.7        |
| SMU.879        | multiple sugar-binding ABC transporter, permease protein MsmF                | -2.6        |
| SMU.880        | multiple sugar-binding ABC transporter, permease protein MsmG                | -2.5        |
| SMU.881        | sucrose phosphorylase, GtfA                                                  | -2.8        |
| SMU.882        | multiple sugar-binding ABC transporter, ATP-binding protein, MsmK            | -2.4        |
| SMU.883        | dextran glucosidase DexB                                                     | -2.8        |
| SMU.887        | galactose-1-P-uridyl transferase, GalT                                       | -2.2        |

SI Table S3. Bacterial strains used in this study

| Strain                              | Description*                                                                                                           | Reference                    |
|-------------------------------------|------------------------------------------------------------------------------------------------------------------------|------------------------------|
| <b><i>S. mutans</i></b>             |                                                                                                                        |                              |
| UA159                               | Wild-type                                                                                                              | ATCC                         |
| $\Delta comC$                       | $\Delta smu.1915$ ; Em <sup>r</sup>                                                                                    | This work                    |
| $\Delta comC$ complemented          | $\Delta smu.1915(pcomC)$ ; Em <sup>r</sup> , Spc <sup>r</sup>                                                          | This work                    |
| $\Delta comE$                       | $\Delta smu.1917$ ; Em <sup>r</sup>                                                                                    | This work                    |
| $\Delta comDE$                      | $\Delta smu.1916-smu.1917$ ; Em <sup>r</sup>                                                                           | This work                    |
| $\Delta comX$                       | $\Delta smu.1997$ ; Em <sup>r</sup>                                                                                    | This work                    |
| $\Delta$ mutacin IV                 | $\Delta smu.150-smu.151$ ; Em <sup>r</sup>                                                                             | This work                    |
| $\Delta cipB$                       | $\Delta smu.1914$ ; Em <sup>r</sup>                                                                                    | This work                    |
| $\Delta cipI$                       | $\Delta smu.925$ ; Em <sup>r</sup>                                                                                     | This work                    |
| $\Delta 1913$                       | $\Delta smu.1913$ ; Em <sup>r</sup>                                                                                    | This work                    |
| $\Delta 423$                        | $\Delta smu.423$ ; Em <sup>r</sup>                                                                                     | This work                    |
| $\Delta 1906$                       | $\Delta smu.1906$ ; Em <sup>r</sup>                                                                                    | This work                    |
| $\Delta nlmTE$                      | $\Delta smu.286-smu.287$ ; Em <sup>r</sup>                                                                             | Hale <i>et al.</i> , 2005    |
| $\Delta luxS$                       | $\Delta smu.474$ ; Em <sup>r</sup>                                                                                     | Sztajer <i>et al.</i> , 2008 |
| UA159(pIB187)                       | Theta-replicating plasmid with the <i>gusA</i> reporter gene under the control of the <i>P23</i> constitutive promoter | Biswas <i>et al.</i> , 2008  |
| UA159( <i>PcomX-gfp</i> )           | <i>PcomX-gfp</i> fusion into pDL277; Spc <sup>r</sup>                                                                  | Aspiras <i>et al.</i> , 2004 |
| UA159(pDL277)                       | pDL277; Spc <sup>r</sup>                                                                                               | This work                    |
| UA159( <i>Pmsm-1914</i> )           | <i>Pmsm-1914</i> into pDL277; Spc <sup>r</sup>                                                                         | This work                    |
| $\Delta cipI(Pmsm-1914)$            | <i>Pmsm-1914</i> into pDL277; Em <sup>r</sup> , Spc <sup>r</sup>                                                       | This work                    |
| UA159(p925)                         | <i>Smu.925</i> into pDL277; Spc <sup>r</sup>                                                                           | This work                    |
| <b><i>E. coli</i></b>               |                                                                                                                        |                              |
| BL21(pET28a(+))                     | T7 expression vector, non-expression host; Kan <sup>r</sup>                                                            | Novagen                      |
| BL213DE3 (pET28a(+))                | T7 expression vector, expression host; Kan <sup>r</sup>                                                                | Novagen                      |
| BL21(His <sub>6</sub> -fullCipB)    | CipB precursor cloned into pET28a(+), non-expression host; Kan <sup>r</sup>                                            | This work                    |
| BL21(His <sub>6</sub> -GGCipB)      | Mature form of CipB cloned into pET28a(+), non-expression host; Kan <sup>r</sup>                                       | This work                    |
| BL21DE3(His <sub>6</sub> -fullCipB) | CipB precursor cloned into pET28a(+), expression host; Kan <sup>r</sup>                                                | This work                    |
| BL21DE3(His <sub>6</sub> -GGCipB)   | Mature form of CipB cloned into pET28a(+), expression host; Kan <sup>r</sup>                                           | This work                    |
| <i>L. lactis</i> I6                 | Indicator strain, susceptible to CipB                                                                                  | Hale <i>et al.</i> , 2005    |
| <i>S. salivarius</i> 25975          | Wild-type                                                                                                              | M. Frenette, U. Laval        |
| <i>S. thermophilus</i> LMG18311     | Wild-type                                                                                                              | S. Moineau, U. Laval         |

\*Em<sup>r</sup>, erythromycin resistance; Spc<sup>r</sup>, spectinomycin resistance; Kan<sup>r</sup>, kanamycin resistance
